# Supplementary material for: Iron(iii) complexes of tripodal tetradentate 4N ligands as functional models for catechol dioxygenases: the electronic vs. steric effect on extradiol cleavage
Source: Royal Society of Chemistry journal article supplement (doi:10.1039/c3dt52145a), 2014-08-21
Supplement: c3dt52145a1.pdf [file c3dt52145a1.pdf]

## **Supporting Information**

### **Iron(III) Complexes of Tripodal Tetradentate 4N Ligands as Functional Models for Catechol Dioxygenases: Electronic Vs Steric Effect on Exradiol Cleavage**

Mani Balamurugan,<sup>a</sup> Prabha Vadivelu<sup>b</sup> and Mallayan Palaniandavar<sup>\*ac</sup>

<sup>a</sup>*School of Basic and Applied Sciences, Department of Chemistry, Central University of Tamil Nadu, Thiruvarur - 610 004, Tamil Nadu, India.*

<sup>b</sup>*Chemical Sciences and Technology Division, National Institute for Interdisciplinary Science and Technology, CSIR, Trivandrum 695019, India*

<sup>c</sup>*School of Chemistry, Bharathidasan University, Tiruchirappalli - 620 024, Tamil Nadu, India.*

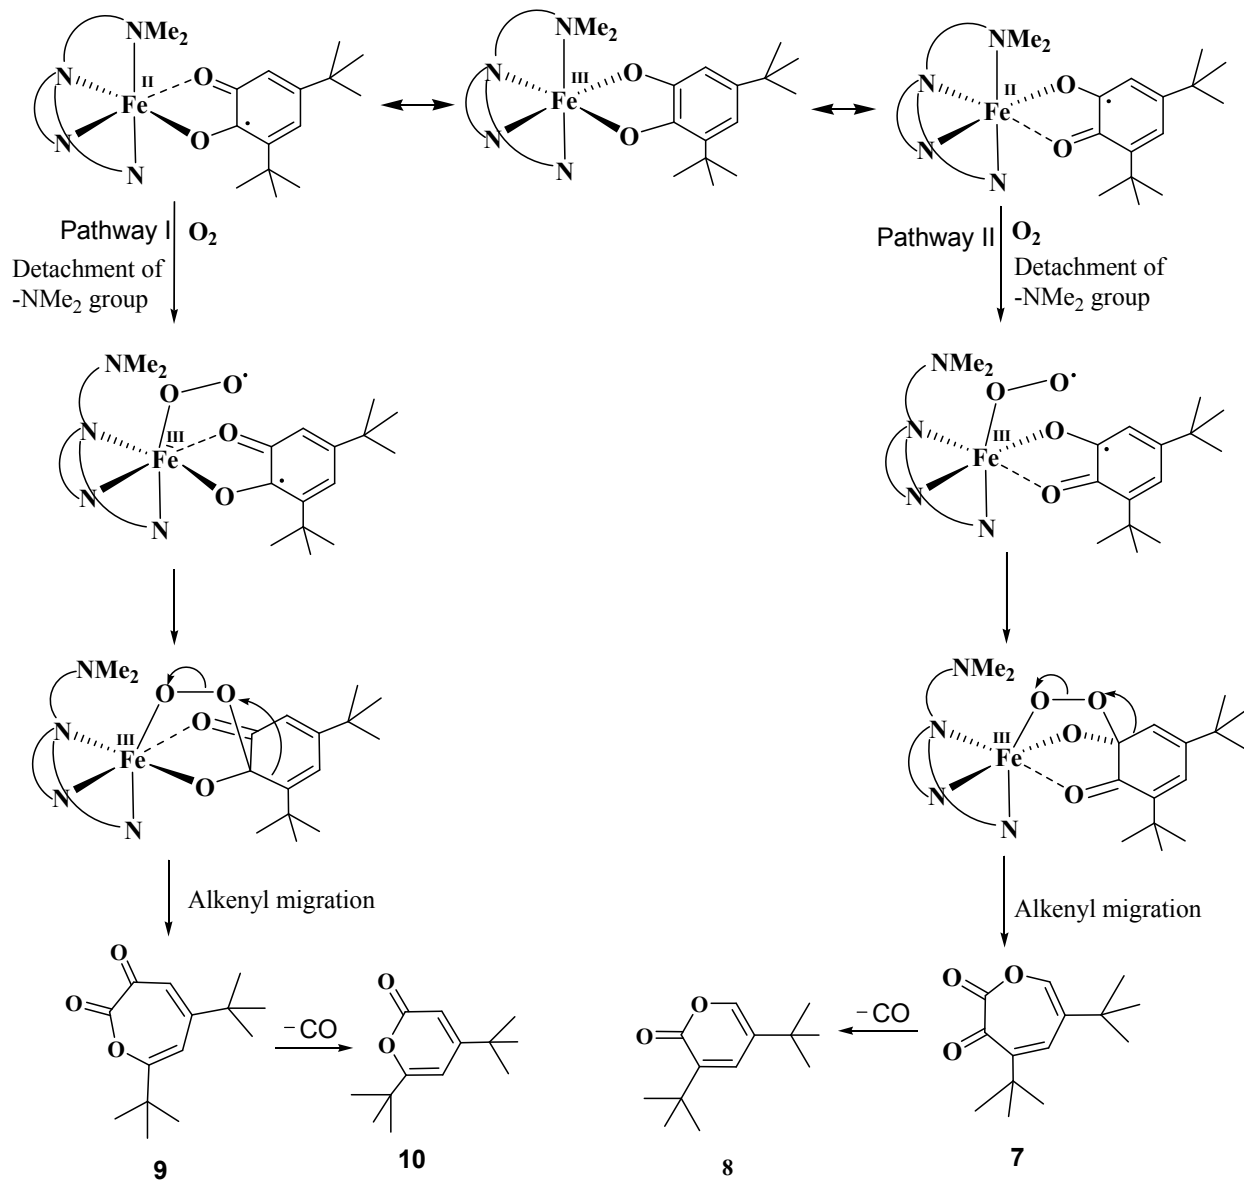

**Scheme S1.** Mechanistic pathway for the formation of extradiol products **7 & 8** and **9 & 10**

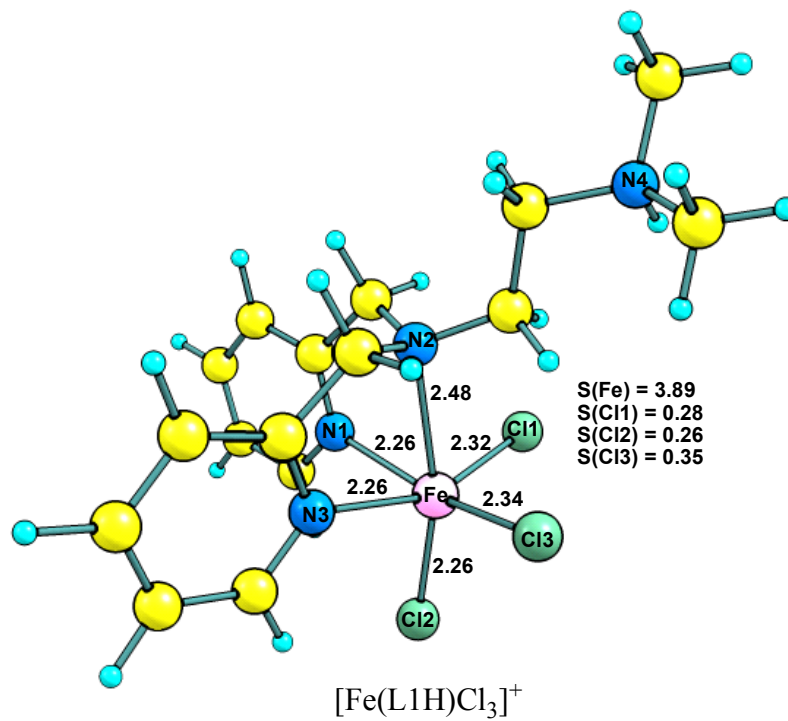

**Figure S1.** The optimized geometries of  $[\text{Fe}(\text{L1H})\text{Cl}_3]^+$  (**1a**). Selected bond lengths (Å) along with the key spin densities are given.

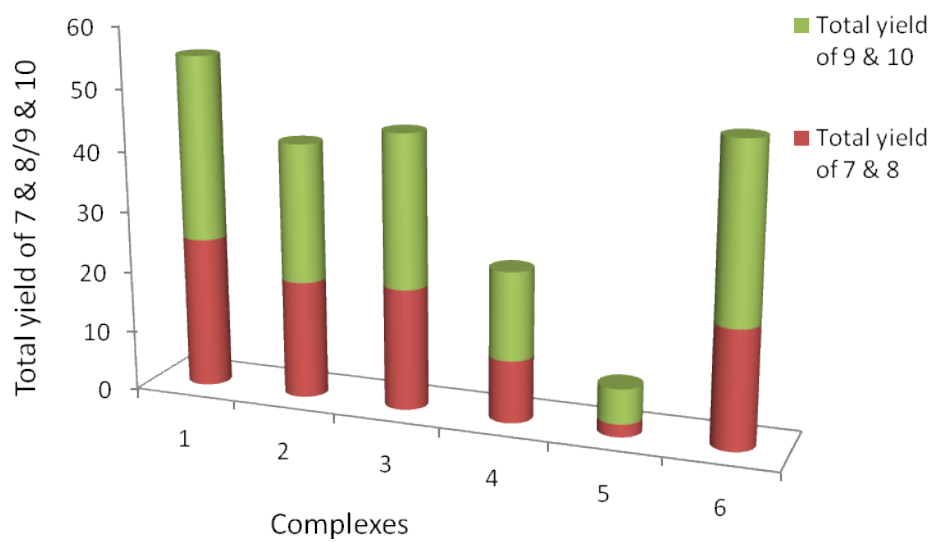

**Figure S2.** Variation of extradiol products yield in the oxidative cleavage of  $\text{H}_2\text{DBC}$  by **1** - **6**
